# Supplementary material
Source: Elsevier journal article supplement (https://www.sciencedirect.com/science/article/pii/S1885585724000914)

**MATERIAL ADICIONAL**

**Tabla 1 del material adicional**

Prevalencia bruta de obesidad según sexo en adultos  $\geq 15$  años\* entre 1987-2020 y su razón de masculinidad acompañadas de sus intervalos de confianza del 95%.

| Año  | Sexo   |      |             |         |      |             |         |      |             | Razón de masculinidad |             |
|------|--------|------|-------------|---------|------|-------------|---------|------|-------------|-----------------------|-------------|
|      | Total  |      |             | Varones |      |             | Mujeres |      |             | %                     | IC95%       |
|      | n      | %    | IC95%       | n       | %    | IC95%       | n       | %    | IC95%       |                       |             |
| 1987 | 22.400 | 7,3  | (7,0-7,7)   | 11.919  | 6,8  | (6,3-7,2)   | 10.481  | 8,0  | (7,5-8,5)   | 0,84                  | (0,77-0,92) |
| 1993 | 17.836 | 9,2  | (8,8-9,7)   | 9.113   | 8,8  | (8,1-9,4)   | 8.723   | 9,7  | (9,1-10,5)  | 0,90                  | (0,81-1,00) |
| 1995 | 5.390  | 10,7 | (9,9-11,5)  | 2.791   | 10,3 | (9,2-11,5)  | 2.599   | 11,1 | (9,9-12,3)  | 0,93                  | (0,80-1,09) |
| 1997 | 5.547  | 12,2 | (11,3-13,0) | 2.875   | 11,5 | (10,4-12,7) | 2.672   | 12,8 | (11,6-14,2) | 0,90                  | (0,78-1,03) |
| 2001 | 18.814 | 12,9 | (12,4-13,5) | 9.514   | 12,0 | (11,3-12,7) | 9.300   | 13,8 | (13,1-14,6) | 0,87                  | (0,80-0,94) |
| 2003 | 21.175 | 13,4 | (12,9-14,0) | 9.658   | 13,1 | (12,3-14,0) | 11.517  | 13,7 | (13,0-14,5) | 0,95                  | (0,88-1,04) |
| 2006 | 26.202 | 15,4 | (14,8-16,1) | 10.894  | 15,5 | (14,6-16,5) | 15.308  | 15,4 | (14,5-16,3) | 1,01                  | (0,93-1,10) |
| 2009 | 20.573 | 15,7 | (15,1-16,3) | 9.571   | 16,9 | (16,1-17,9) | 11.002  | 14,4 | (13,7-15,2) | 1,18                  | (1,09-1,27) |
| 2011 | 19.067 | 16,7 | (16,1-17,4) | 9.121   | 17,6 | (16,7-18,6) | 9.946   | 15,8 | (15,0-16,7) | 1,11                  | (1,03-1,20) |
| 2014 | 21.785 | 16,6 | (16,0-17,2) | 10.263  | 16,8 | (16,0-17,7) | 11.522  | 16,3 | (15,5-17,2) | 1,03                  | (0,96-1,11) |
| 2017 | 22.016 | 17,0 | (16,4-17,6) | 10.317  | 17,6 | (16,8-18,5) | 11.699  | 16,4 | (15,6-17,2) | 1,08                  | (1,00-1,16) |
| 2020 | 20.906 | 15,7 | (15,1-16,3) | 10.015  | 16,1 | (15,3-17,0) | 10.891  | 15,3 | (14,4-16,1) | 1,06                  | (0,98-1,14) |

IC95%: intervalo de confianza del 95%.

\*Hasta 2009,  $\geq 16$  años; a partir de 2011,  $\geq 15$  años

**Tabla 2 del material adicional**

Prevalencia de obesidad según grupo de edad en adultos  $\geq 15$  años entre 1987-2020 acompañada de intervalos de confianza del 95%.

| Año                                        | Grupo de edad           |           |            |             |            |             |                |             |
|--------------------------------------------|-------------------------|-----------|------------|-------------|------------|-------------|----------------|-------------|
|                                            | 15-24 años <sup>a</sup> |           | 25-44 años |             | 45-64 años |             | $\geq 65$ años |             |
|                                            | %                       | IC95%     | %          | IC95%       | %          | IC95%       | %              | IC95%       |
| 1987                                       | 0,9                     | (0,6-1,1) | 5,2        | (4,8-5,7)   | 12,8       | (12,0-13,6) | 13,1           | (11,9-14,4) |
| 1993                                       | 1,9                     | (1,5-2,5) | 6,3        | (5,7-7,0)   | 15,2       | (14,2-16,4) | 16,5           | (14,9-18,3) |
| 1995                                       | 3,2                     | (2,3-4,4) | 7,8        | (6,7-9,1)   | 17,4       | (15,5-19,4) | 17,3           | (14,7-20,2) |
| 1997                                       | 1,8                     | (1,2-2,8) | 8,9        | (7,8-10,2)  | 19,6       | (17,7-21,6) | 20,9           | (18,2-23,9) |
| 2001                                       | 2,5                     | (2,0-3,2) | 8,9        | (8,2-9,6)   | 18,9       | (17,7-20,2) | 22,6           | (21,0-24,2) |
| 2003                                       | 2,6                     | (1,9-3,7) | 9,5        | (8,7-10,4)  | 19,0       | (17,7-20,4) | 21,3           | (20,0-22,7) |
| 2006                                       | 4,7                     | (3,6-6,1) | 11,1       | (10,3-12,0) | 20,3       | (19,1-21,5) | 24,5           | (22,4-26,6) |
| 2009                                       | 4,8                     | (3,7-6,2) | 12,3       | (11,4-13,2) | 19,7       | (18,6-20,9) | 23,5           | (22,2-25,0) |
| 2011                                       | 4,6                     | (3,6-5,9) | 12,5       | (11,6-13,5) | 21,6       | (20,4-22,9) | 25,4           | (23,9-27,0) |
| 2014                                       | 3,7                     | (2,8-5,0) | 12,9       | (12,0-13,9) | 20,6       | (19,5-21,8) | 23,8           | (22,6-25,2) |
| 2017                                       | 5,9                     | (4,7-7,5) | 13,1       | (12,2-14,1) | 20,1       | (19,0-21,2) | 24,2           | (23,0-25,5) |
| 2020                                       | 3,7                     | (2,8-4,9) | 12,8       | (11,7-13,9) | 19,0       | (18,0-20,2) | 21,2           | (20,0-22,5) |
| Cambio relativo<br>1987-2020  <sup>b</sup> | 3,4                     | (1,6-5,2) | 1,4        | (1,1-1,7)   | 0,5        | (0,4-0,6)   | 0,6            | (0,4-0,8)   |

IC95%: intervalo de confianza del 95%.

<sup>a</sup> Hasta 2009,  $\geq 16$  años; a partir de 2011,  $\geq 15$  años

<sup>b</sup> El cambio relativo no se expresa como porcentaje

**Tabla 3 del material adicional**

Prevalencia de obesidad e intervalos de confianza al 95%. según grupo de edad y sexo en adultos  $\geq 15$  años entre 1987-2020

| <b>Año</b> | <b>Varones</b>     |                   |                   |                                  | <b>Mujeres</b>     |                   |                   |                                  |
|------------|--------------------|-------------------|-------------------|----------------------------------|--------------------|-------------------|-------------------|----------------------------------|
|            | <b>Grupos edad</b> |                   |                   |                                  | <b>Grupos edad</b> |                   |                   |                                  |
|            | <b>15-24 años*</b> | <b>25-44 años</b> | <b>45-64 años</b> | <b><math>\geq 65</math> años</b> | <b>15-24 años*</b> | <b>25-44 años</b> | <b>45-64 años</b> | <b><math>\geq 65</math> años</b> |
| 1987       | 1,2 (0,9-1,7)      | 5,9 (5,2-6,6)     | 10,8 (9,8-11,8)   | 9,6 (8,2-11,2)                   | 0,5 (0,3-0,8)      | 4,5 (3,9-5,2)     | 15,2 (13,9-16,6)  | 17,5 (15,5-19,7)                 |
| 1993       | 2,2 (1,6-3,1)      | 6,8 (5,9-7,8)     | 13,8 (12,3-15,3)  | 14,8 (12,6-17,3)                 | 1,7 (1,1-2,5)      | 5,8 (5,0-6,8)     | 16,9 (15,2-18,6)  | 18,2 (15,9-20,8)                 |
| 1995       | 4,5 (3,1-6,5)      | 8,4 (6,8-10,2)    | 15,3 (12,9-18,0)  | 14,8 (11,5-18,8)                 | 1,8 (1,0-3,3)      | 7,2 (5,8-9,0)     | 19,8 (17,0-23,0)  | 19,8 (16,0-24,3)                 |
| 1997       | 2,2 (1,3-3,7)      | 10,5 (8,8-12,5)   | 17,9 (15,4-20,7)  | 15,7 (12,4-19,7)                 | 1,4 (0,7-2,9)      | 7,2 (5,8-9,0)     | 21,5 (18,7-24,6)  | 25,9 (21,8-30,4)                 |
| 2001       | 3,1 (2,3-4,2)      | 10,7 (9,6-11,8)   | 16,2 (14,7-17,9)  | 17,4 (15,5-19,6)                 | 1,9 (1,3-2,9)      | 7,0 (6,2-8,0)     | 21,7 (19,9-23,5)  | 27,3 (25,1-29,8)                 |
| 2003       | 2,9 (1,8-4,7)      | 11,1 (9,9-12,4)   | 17,7 (15,9-19,7)  | 19,2 (17,2-21,5)                 | 2,3 (1,5-3,6)      | 7,9 (6,8-9,1)     | 20,3 (18,5-22,1)  | 22,9 (21,1-24,7)                 |
| 2006       | 4,6 (3,1-6,6)      | 12,1 (10,8-13,4)  | 21,4 (19,5-23,3)  | 22,2 (19,4-25,2)                 | 4,8 (3,3-7,1)      | 10,1 (9,1-11,2)   | 19,1 (17,7-20,7)  | 26,4 (23,6-29,5)                 |
| 2009       | 5,3 (3,8-7,4)      | 14,9 (13,6-16,4)  | 22,1 (20,4-23,9)  | 20,9 (18,9-23,0)                 | 4,3 (2,9-6,3)      | 9,4 (8,3-10,6)    | 17,3 (15,9-18,9)  | 25,7 (23,8-27,6)                 |
| 2011       | 4,6 (3,3-6,5)      | 14,0 (12,7-15,5)  | 24,0 (22,3-25,9)  | 23,7 (21,5-26,0)                 | 4,6 (3,1-6,5)      | 10,9 (9,6-12,4)   | 19,2 (17,5-20,9)  | 26,9 (24,9-29,0)                 |
| 2014       | 3,9 (2,5-5,9)      | 13,4 (12,1-14,8)  | 22,7 (21,1-24,4)  | 21,4 (19,6-23,4)                 | 3,6 (2,4-5,4)      | 12,4 (11,1-13,9)  | 18,5 (17,0-20,2)  | 25,9 (24,1-27,6)                 |

|      |               |                  |                  |                  |               |                  |                  |                  |
|------|---------------|------------------|------------------|------------------|---------------|------------------|------------------|------------------|
| 2017 | 6,2 (4,5-8,3) | 14,3 (12,9-15,7) | 22,8 (21,2-24,4) | 21,6 (19,9-23,5) | 5,7 (4,0-8,0) | 12,0 (10,7-13,4) | 17,4 (16,0-18,9) | 26,4 (24,6-28,2) |
| 2020 | 3,6 (2,4-5,2) | 13,4 (11,9-15,0) | 21,1 (19,5-22,7) | 19,7 (18,0-21,6) | 3,9 (2,6-5,9) | 12,1 (10,7-13,7) | 17,0 (15,5-18,6) | 22,5 (20,8-24,3) |

\* Hasta 2009. > 16 años; a partir de 2011. ≥ 15 años

**Tabla 4 del material adicional**

Prevalencia bruta de obesidad por comunidades autónomas (CCAA) según sexo en adultos ≥ 15 años\* en los años 1987, 2003 y 2020.

| CCAA                   | Varones         |                  |                  | Mujeres         |                  |                  |
|------------------------|-----------------|------------------|------------------|-----------------|------------------|------------------|
|                        | Año             |                  |                  | Año             |                  |                  |
|                        | 1987            | 2003             | 2020             | 1987            | 2003             | 2020             |
| Andalucía              | 6,8 (5,7-8,2)   | 16,0 (13,6-18,8) | 19,1 (16,8-21,6) | 9,6 (8,2-11,3)  | 18,4 (16,0-21,1) | 19,5 (17,1-22,0) |
| Aragón                 | 4,4 (3,0-6,4)   | 11,6 (9,3-14,5)  | 15,8 (11,8-20,7) | 9,9 (7,5-12,9)  | 13,3 (10,9-16,3) | 15,1 (11,1-20,2) |
| Principado de Asturias | 7,1 (4,9-10,2)  | 11,7 (8,4-15,9)  | 20,4 (16,5-24,9) | 6,7 (4,4-9,9)   | 14,7 (11,4-18,9) | 17,5 (14,1-21,5) |
| Illes Balears          | 10,8 (8,0-14,5) | 11,7 (8,4-16,1)  | 18,6 (13,0-26,0) | 10,6 (7,8-14,4) | 13,7 (10,5-17,8) | 14,0 (9,1-20,9)  |
| Canarias               | 6,3 (5,3-7,5)   | 12,1 (9,0-16,1)  | 16,8 (13,4-20,8) | 6,6 (5,5-8,0)   | 16,4 (13,0-20,4) | 17,8 (14,4-21,7) |
| Cantabria              | 7,6 (6,2-9,3)   | 13,4 (9,9-18,0)  | 15,1 (11,6-19,4) | 6,8 (5,4-8,5)   | 10,9 (7,5-15,6)  | 11,7 (8,6-15,7)  |
| Castilla León          | 8,7 (7,0-10,8)  | 12,0 (10,5-13,7) | 16,4 (12,9-20,7) | 9,1 (7,2-11,6)  | 11,9 (10,5-13,5) | 16,1 (12,8-20,2) |
| Castilla-La Mancha     | 7,0 (4,9-9,9)   | 16,1 (12,7-20,3) | 16,8 (13,5-20,7) | 7,0 (4,7-10,4)  | 17,3 (14,0-21,3) | 10,9 (8,3-14,2)  |
| Cataluña               | 6,2 (4,1-9,2)   | 11,0 (9,0-13,4)  | 12,8 (10,7-15,3) | 7,6 (5,0-11,3)  | 11,3 (9,4-13,6)  | 14,7 (12,4-17,2) |
| Comunitat Valenciana   | 4,5 (3,2-6,3)   | 13,4 (10,7-16,8) | 18,8 (16,0-21,9) | 6,3 (4,7-8,3)   | 15,7 (13,2-18,6) | 14,2 (11,9-16,8) |

|                            |                |                  |                  |                 |                  |                  |
|----------------------------|----------------|------------------|------------------|-----------------|------------------|------------------|
| Extremadura                | 9,5 (7,8-11,5) | 20,4 (16,2-25,3) | 13,8 (10,5-17,8) | 11,1 (9,0-13,6) | 16,9 (13,3-21,2) | 11,4 (8,5-15,1)  |
| Galicia                    | 5,4 (3,3-8,7)  | 14,0 (11,0-17,5) | 17,0 (13,9-20,6) | 6,8 (4,2-11,0)  | 14,2 (11,6-17,4) | 16,2 (13,2-19,7) |
| Comunidad de Madrid        | 5,8 (3,9-8,5)  | 10,7 (8,4-13,6)  | 13,7 (11,6-16,1) | 9,8 (7,3-13,0)  | 8,7 (6,8-10,9)   | 12,9 (11,0-15,2) |
| Región de Murcia           | 5,2 (3,3-8,0)  | 14,5 (11,0-18,8) | 18,6 (14,6-23,3) | 3,6 (2,0-6,4)   | 16,4 (13,0-20,5) | 18,5 (15,0-22,6) |
| Comunidad Foral de Navarra | 6,4 (4,3-9,4)  | 13,0 (9,4-17,6)  | 13,0 (9,5-17,6)  | 9,5 (6,9-13,1)  | 14,1 (10,6-18,6) | 12,3 (8,8-16,9)  |
| País Vasco                 | 5,8 (4,3-7,7)  | 12,0 (9,1-15,6)  | 13,1 (10,3-16,6) | 8,4 (6,6-10,7)  | 9,0 (6,6-12,3)   | 13,0 (10,2-16,6) |
| La Rioja                   | 5,6 (4,1-7,6)  | 10,2 (6,8-15,1)  | 16,6 (12,2-22,3) | 6,0 (4,4-8,0)   | 10,4 (7,2-14,7)  | 14,6 (10,2-20,4) |

CCAA: comunidades autónomas.

\*Hasta 2009. ≥16 años; a partir de 2011. ≥ 15 años

**Tabla 5 del material adicional**

Análisis de tendencia de la prevalencia bruta de obesidad e intervalos de confianza del 95% (IC95%) por Comunidades Autónomas (CCAA), en adultos  $\geq 15$  años\* entre 1987-2020.

| Sexo    | CCAA                   | Puntos de cambio   | Periodo 1 |     |            | Periodo 2 |      |            | Periodo 3 |      |            |
|---------|------------------------|--------------------|-----------|-----|------------|-----------|------|------------|-----------|------|------------|
|         |                        |                    | Años      | PCA | IC95%      | Años      | PCA  | IC95%      | Años      | PCA  | IC95%      |
| Varones | Andalucía              | 2 (en 1995 y 2011) | 1987-1995 | 9,1 | 2,1 a 16,5 | 1995-2011 | 2,7  | 0,0 a 5,5  | 2011-2020 | -0,6 | -5,4 a 4,0 |
|         | Aragón                 | 0                  | 1987-2020 | 3,1 | 1,7 a 4,5  |           |      |            |           |      |            |
|         | Principado de Asturias | 0                  | 1987-2020 | 3,2 | 1,8 a 4,7  |           |      |            |           |      |            |
|         | Illes Balears          | 0                  | 1987-2020 | 2,0 | 1,1 a 3,1  |           |      |            |           |      |            |
|         | Canarias               | 1 (en 2011)        | 1987-2011 | 4,5 | 3,6 a 5,3  | 2011-2020 | -0,7 | -4,3 a 3,0 |           |      |            |
|         | Cantabria              | 0                  | 1987-2020 | 2,2 | 0,9 a 3,5  |           |      |            |           |      |            |
|         | Castilla León          | 0                  | 1987-2020 | 2,7 | 1,5 a 3,9  |           |      |            |           |      |            |
|         | Castilla-La Mancha     | 0                  | 1987-2020 | 2,5 | 1,1 a 3,9  |           |      |            |           |      |            |
|         | Cataluña               | 1 (en 2009)        | 1987-2009 | 4,3 | 2,5 a 6,1  | 2009-2020 | -1,6 | -4,2 a 1,1 |           |      |            |
|         | Comunitat Valenciana   | 1 (en 2003)        | 1987-2003 | 7,3 | 4,8 a 9,8  | 2003-2020 | 1,7  | 0,4 a 3,0  |           |      |            |

|         |                            |             |           |     |            |           |      |            |  |  |  |
|---------|----------------------------|-------------|-----------|-----|------------|-----------|------|------------|--|--|--|
|         | Extremadura                | 1 (en 2009) | 1987-2009 | 4,2 | 2,0 a 6,4  | 2009-2020 | -3,2 | -7,9 a 1,8 |  |  |  |
|         | Galicia                    | 0           | 1987-2020 | 2,5 | 1,1 a 3,9  |           |      |            |  |  |  |
|         | Comunidad de Madrid        | 1 (en 2011) | 1987-2011 | 4,2 | 2,8 a 5,6  | 2011-2020 | -0,9 | -4,6 a 2,8 |  |  |  |
|         | Región de Murcia           | 1 (en 2006) | 1987-2006 | 6,0 | 3,1 a 9,0  | 2006-2020 | -0,5 | -3,0 a 2,0 |  |  |  |
|         | Comunidad Foral de Navarra | 0           | 1987-2020 | 1,6 | 0,1 a 3,1  |           |      |            |  |  |  |
|         | País Vasco                 | 1 (en 2009) | 1987-2009 | 5,3 | 2,1 a 8,6  | 2009-2020 | -1,4 | -6,8 a 4,4 |  |  |  |
|         | La Rioja                   | 0           | 1987-2020 | 3,7 | 2,5 a 5,0  |           |      |            |  |  |  |
| Mujeres | Andalucía                  | 1 (en 1997) | 1987-1997 | 6,2 | 4,6 a 7,8  | 1997-2020 | 0,6  | 0,2 a 0,9  |  |  |  |
|         | Aragón                     | 0           | 1987-2020 | 1,4 | 0,6 a 2,2  |           |      |            |  |  |  |
|         | Principado de Asturias     | 0           | 1987-2020 | 2,9 | 1,2 a 4,7  |           |      |            |  |  |  |
|         | Illes Balears              | 0           | 1987-2020 | 0,5 | -1,0 a 1,9 |           |      |            |  |  |  |
|         | Canarias                   | 1 (en 1997) | 1987-1997 | 8,7 | 1,7 a 16,1 | 1997-2020 | 1,0  | -0,7 a 2,7 |  |  |  |
|         | Cantabria                  | 0           | 1987-2020 | 2,1 | 1,1 a 3,0  |           |      |            |  |  |  |
|         | Castilla León              | 0           | 1987-2020 | 1,6 | 0,2 a 3,1  |           |      |            |  |  |  |
|         | Castilla-La Mancha         | 0           | 1987-2020 | 1,2 | -0,7 a 3,2 |           |      |            |  |  |  |



|                            |                    |           |     |            |           |      |             |           |      |             |
|----------------------------|--------------------|-----------|-----|------------|-----------|------|-------------|-----------|------|-------------|
| Cataluña                   | 0                  | 1987-2020 | 2,2 | 1,3 a 3,2  |           |      |             |           |      |             |
| Comunitat Valenciana       | 2 (en 1997 y 2014) | 1987-1997 | 8,0 | 1,8 a 14,5 | 1997-2014 | 1,6  | -1,0 a 4,3  | 2014-2020 | -3,3 | -12,0 a 6,2 |
| Extremadura                | 1 (en 2011)        | 1987-2011 | 1,9 | 0,3 a 3,5  | 2011-2020 | -4,7 | -12,3 a 3,6 |           |      |             |
| Galicia                    | 0                  | 1987-2020 | 1,3 | 0,3 a 2,4  |           |      |             |           |      |             |
| Comunidad de Madrid        | 0                  | 1987-2020 | 1,3 | 0,2 a 2,4  |           |      |             |           |      |             |
| Región de Murcia           | 0                  | 1987-2020 | 1,5 | -1,0 a 4,0 |           |      |             |           |      |             |
| Comunidad Foral de Navarra | 0                  | 1987-2020 | 1,2 | -0,3 a 2,6 |           |      |             |           |      |             |
| País Vasco                 | 0                  | 1987-2020 | 1,9 | 0,7 a 3,1  |           |      |             |           |      |             |
| La Rioja                   | 0                  | 1987-2020 | 3,4 | 2,0 a 4,8  |           |      |             |           |      |             |

CCAA: comunidades autónomas, IC95%: intervalo de confianza del 95%, PCA: porcentaje de cambio anual.

**Figura 1 del material adicional.** Evolución de la prevalencia bruta de obesidad por comunidad autónoma y sexo en adultos de  $\geq 15$  años y su tendencia entre 1987-2020.

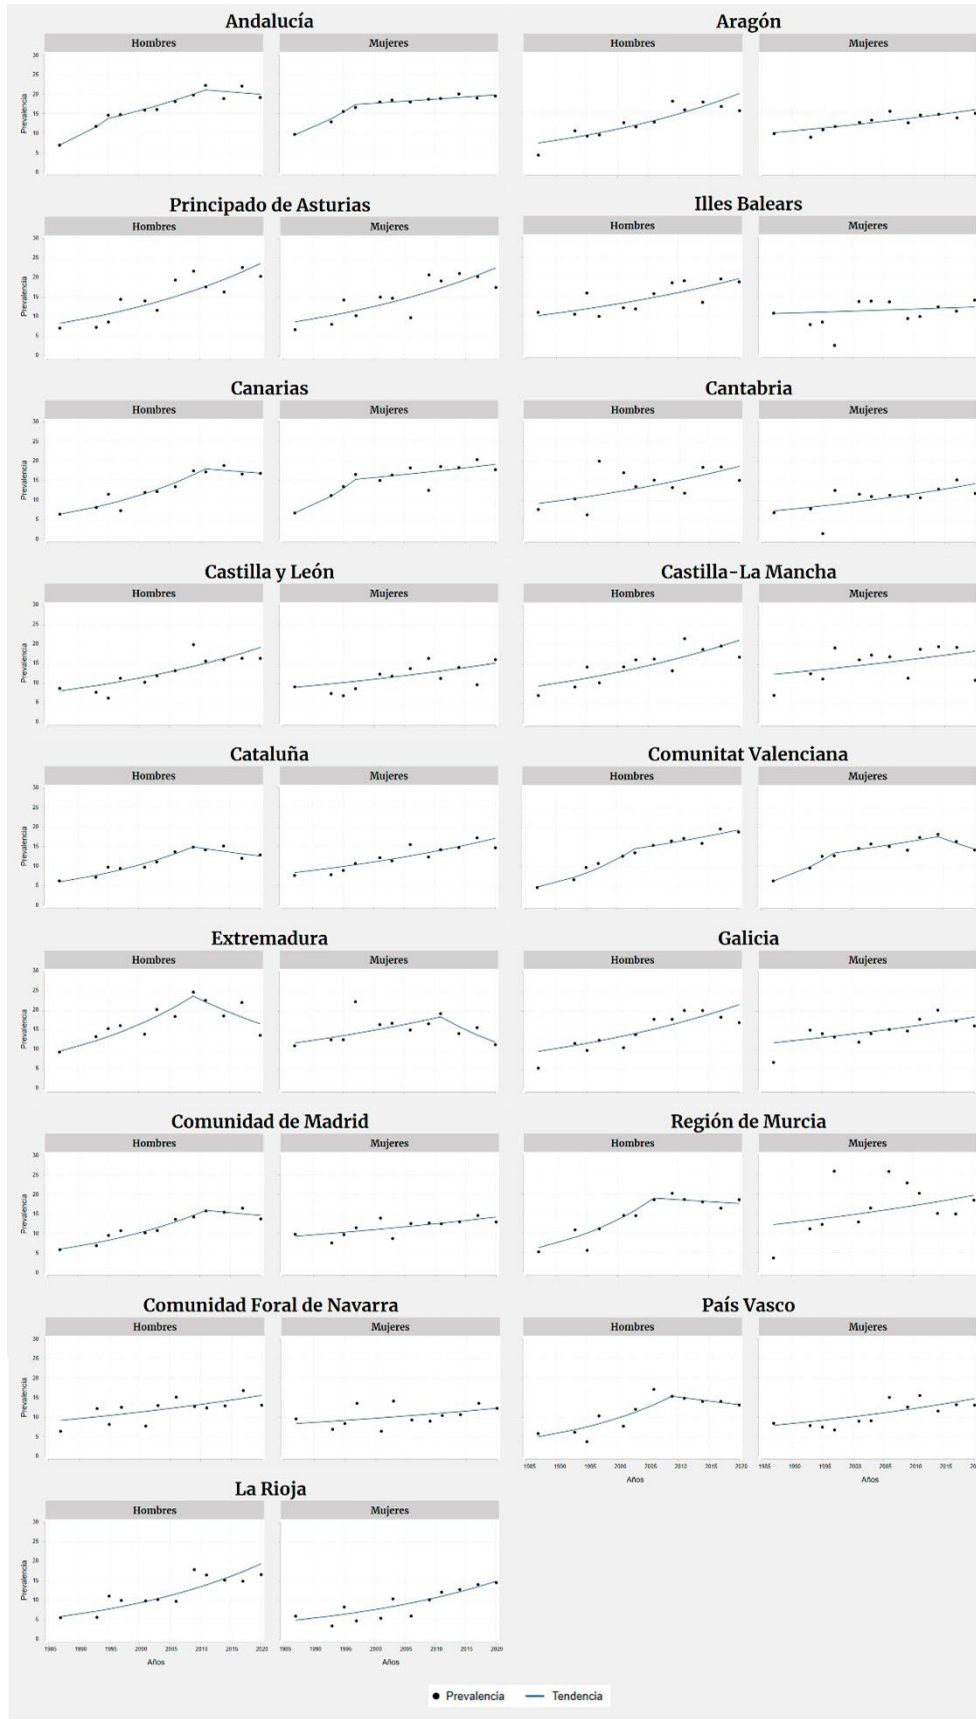

Supplement: mmc1 [file mmc1.pdf]
